# Supplementary material
Source: publisher figshare collection journal article supplement (https://acs.figshare.com/ndownloader/files/4357162)

Supporting Information for

# Interionic Interactions of Binary Gels Consisting of Pyrrolidinium-Based Zwitterionic Compounds and Lithium Salts

*HoSeok Park,<sup>†\*</sup> Hoon Sik Kim,<sup>‡</sup> Young Mee Jung<sup>¶\*</sup>*

<sup>†</sup> Department of Chemical Engineering, College of Engineering, Kyung Hee University, 1 Seochon-dong, Giheung-gu, Yongin-si, Gyeonggi-do 446-701, Korea

<sup>‡</sup> Department of Chemistry and Research Institute of Basic Sciences, Kyung Hee University, 1 Hoegidong, Dondamoongu, Seoul, Korea

<sup>¶</sup> Department of Chemistry, Kangwon National University, Chunchon, Korea

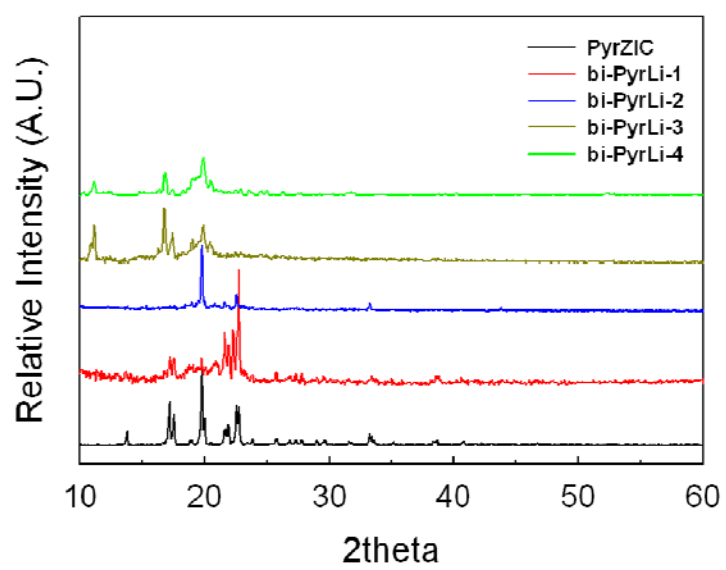

**Figure S1.** XRD patterns of PyrZIC and bi-PyrLis.

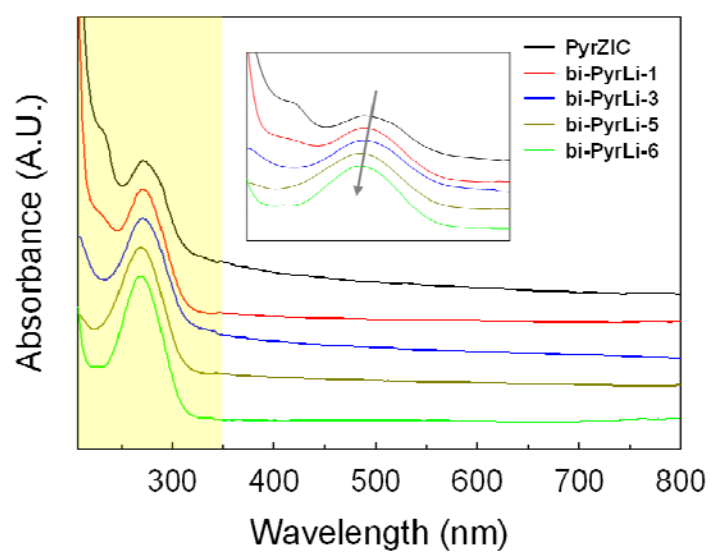

**Figure S2.** UV-vis spectra of PyrZIC and bi-PyrLis. Inset is the enlarged image of yellow box.

**Table S1.** Bond distances, bond angles, and dihedral angles of PyrZIC-LiTFSI at the respectively optimized state. Atom numbering of PyrZIC-LiTFSI at the respectively optimized state below. Symbol indicates atom, NA, NB, and NC indicates nearest atoms, bond indicates the distance between selected atom and NA, angle indicates the angle of NA-(selected atom)-NB, and dihedral indicates the dihedral angle of (selected atom)-(the plane composed of NA, NB, and NC). Light and dark gray, blue, red, yellow, cyan, and pink colors represent hydrogen, carbon, nitrogen, oxygen, sulfur, fluoride, and lithium atoms, respectively.

| #  | Symbol | NA | NB | NC | Bond     | Angle      | Dihedral    |
|----|--------|----|----|----|----------|------------|-------------|
| 1  | C      |    |    |    |          |            |             |
| 2  | C      | 1  |    |    | 1.528826 |            |             |
| 3  | N      | 2  | 1  |    | 1.530197 | 104.966549 |             |
| 4  | C      | 3  | 2  | 1  | 1.525797 | 102.423165 | -39.178932  |
| 5  | C      | 4  | 3  | 2  | 1.535859 | 105.886795 | 35.985329   |
| 6  | H      | 1  | 2  | 3  | 1.088926 | 109.615840 | 147.537622  |
| 7  | H      | 2  | 1  | 5  | 1.089016 | 112.633277 | -87.404154  |
| 8  | H      | 4  | 3  | 2  | 1.088396 | 106.629768 | -83.431807  |
| 9  | C      | 3  | 2  | 1  | 1.520351 | 112.572316 | -157.123710 |
| 10 | C      | 9  | 3  | 2  | 1.539896 | 114.750985 | -67.585927  |
| 11 | H      | 9  | 3  | 2  | 1.087419 | 105.258705 | 54.443616   |
| 12 | H      | 9  | 3  | 2  | 1.091732 | 105.785559 | 169.112299  |
| 13 | C      | 10 | 9  | 3  | 1.532928 | 113.196566 | 136.036189  |
| 14 | H      | 10 | 9  | 3  | 1.093481 | 109.804860 | -101.933871 |
| 15 | H      | 10 | 9  | 3  | 1.092173 | 111.353054 | 16.186378   |
| 16 | H      | 13 | 10 | 9  | 1.091502 | 113.471948 | 45.225936   |
| 17 | H      | 13 | 10 | 9  | 1.090643 | 110.315725 | 167.362293  |
| 18 | S      | 13 | 10 | 9  | 1.831018 | 112.044658 | -76.356504  |
| 19 | O      | 18 | 13 | 10 | 1.467920 | 106.842625 | -172.130308 |
| 20 | O      | 18 | 13 | 10 | 1.477016 | 104.956898 | -46.499362  |
| 21 | O      | 18 | 13 | 10 | 1.526669 | 103.171316 | 69.830061   |
| 22 | H      | 5  | 4  | 3  | 1.091360 | 111.618935 | 101.807213  |
| 23 | H      | 1  | 2  | 3  | 1.092041 | 111.369822 | -93.246982  |
| 24 | H      | 5  | 4  | 3  | 1.089427 | 109.310378 | -139.230947 |
| 25 | H      | 4  | 3  | 2  | 1.090017 | 108.411990 | 159.821939  |
| 26 | H      | 2  | 1  | 5  | 1.087820 | 115.658319 | 148.419205  |
| 27 | C      | 3  | 2  | 1  | 1.497311 | 110.880695 | 77.853527   |
| 28 | H      | 27 | 3  | 2  | 1.089695 | 108.766482 | -177.978223 |
| 29 | H      | 27 | 3  | 2  | 1.087753 | 109.331820 | -58.211575  |
| 30 | H      | 27 | 3  | 2  | 1.087276 | 109.526023 | 61.837427   |
| 31 | Li     | 21 | 18 | 13 | 1.810464 | 137.453212 | 136.568199  |
| 32 | F      | 31 | 21 | 18 | 5.538157 | 111.015135 | -157.787899 |
| 33 | C      | 31 | 21 | 18 | 4.518194 | 116.848080 | -149.144971 |
| 34 | F      | 33 | 31 | 21 | 1.332733 | 103.095678 | 79.908316   |
| 35 | F      | 33 | 31 | 21 | 1.331820 | 87.894734  | -170.778398 |
| 36 | S      | 33 | 31 | 21 | 1.889832 | 27.636189  | -25.567041  |
| 37 | O      | 36 | 33 | 31 | 1.460615 | 104.617867 | 144.337125  |
| 38 | O      | 36 | 33 | 31 | 1.477481 | 104.586220 | 19.940227   |
| 39 | N      | 36 | 33 | 31 | 1.609717 | 103.912345 | -101.373070 |
| 40 | S      | 39 | 36 | 33 | 1.611890 | 126.265275 | 114.591716  |
| 41 | O      | 40 | 39 | 36 | 1.477150 | 114.354302 | 13.855005   |
| 42 | O      | 40 | 39 | 36 | 1.454721 | 108.367640 | 146.184824  |
| 43 | C      | 40 | 39 | 36 | 1.891017 | 105.730592 | -99.815465  |
| 44 | F      | 43 | 40 | 39 | 1.332175 | 110.031935 | -51.851330  |
| 45 | F      | 43 | 40 | 39 | 1.331851 | 108.966297 | -171.715785 |
| 46 | F      | 43 | 40 | 39 | 1.333440 | 110.023728 | 68.558635   |

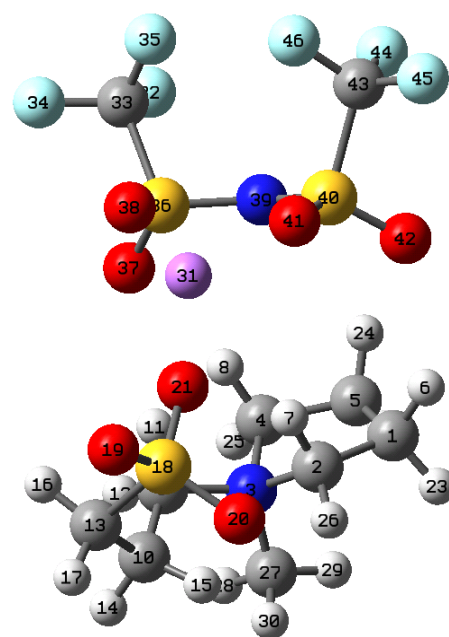

**Table S2.** Bond distances, bond angles, and dihedral angles of LiTFSI -LiTFSI at the respectively optimized state. Atom numbering of LiTFSI-LiTFSI at the respectively optimized state below. Symbol indicates atom, NA, NB, and NC indicates nearest atoms, bond indicates the distance between selected atom and NA, angle indicates the angle of NA-(selected atom)-NB, and dihedral indicates the dihedral angle of (selected atom)-(the plane composed of NA, NB, and NC). Gray, blue, red, yellow, cyan, and pink colors represent carbon, nitrogen, oxygen, sulfur, fluoride, and lithium atoms, respectively.

| #  | Symbol | NA | NB | NC | Bond     | Angle      | Dihedral    |
|----|--------|----|----|----|----------|------------|-------------|
| 1  | C      |    |    |    |          |            |             |
| 2  | F      | 1  |    |    | 1.329870 |            |             |
| 3  | F      | 1  | 2  |    | 1.327838 | 109.708683 |             |
| 4  | F      | 1  | 3  | 2  | 1.336781 | 109.351620 | -119.781405 |
| 5  | S      | 1  | 3  | 2  | 1.891906 | 110.140773 | 119.822746  |
| 6  | O      | 5  | 1  | 3  | 1.443514 | 106.187815 | -61.422807  |
| 7  | O      | 5  | 1  | 6  | 1.482393 | 103.639783 | -125.784131 |
| 8  | N      | 5  | 1  | 7  | 1.617829 | 103.910014 | -118.261986 |
| 9  | S      | 8  | 5  | 1  | 1.581466 | 126.574119 | 98.617240   |
| 10 | O      | 9  | 8  | 5  | 1.482905 | 116.724228 | -7.199285   |
| 11 | O      | 9  | 8  | 5  | 1.476554 | 111.084135 | 126.772582  |
| 12 | C      | 9  | 8  | 5  | 1.889997 | 103.925352 | -122.752150 |
| 13 | F      | 12 | 9  | 8  | 1.325920 | 109.794025 | -57.018675  |
| 14 | F      | 12 | 9  | 8  | 1.329360 | 108.458805 | -177.050927 |
| 15 | F      | 12 | 9  | 8  | 1.329808 | 109.329131 | 63.445565   |
| 16 | Li     | 7  | 5  | 1  | 1.882344 | 133.609606 | -103.810198 |
| 17 | O      | 16 | 7  | 5  | 1.888321 | 128.949844 | -113.569899 |
| 18 | S      | 17 | 16 | 7  | 1.476557 | 128.656404 | 81.164063   |
| 19 | C      | 18 | 17 | 16 | 1.890011 | 103.308273 | -137.874959 |
| 20 | O      | 18 | 17 | 16 | 1.482901 | 114.635883 | -23.741444  |
| 21 | N      | 18 | 17 | 16 | 1.581472 | 111.085049 | 111.252049  |
| 22 | F      | 19 | 18 | 17 | 1.329354 | 108.457377 | 60.977780   |
| 23 | F      | 19 | 18 | 17 | 1.325913 | 109.794252 | -59.053490  |
| 24 | F      | 19 | 18 | 17 | 1.329810 | 109.329532 | -179.519335 |
| 25 | Li     | 11 | 9  | 8  | 1.888260 | 128.657422 | -111.172053 |
| 26 | S      | 21 | 18 | 17 | 1.617838 | 126.567565 | -126.793718 |
| 27 | O      | 26 | 21 | 18 | 1.482390 | 112.949428 | 13.113459   |
| 28 | O      | 26 | 21 | 18 | 1.443509 | 109.929879 | 148.185197  |
| 29 | C      | 26 | 21 | 18 | 1.891911 | 103.917523 | -98.527334  |
| 30 | F      | 29 | 26 | 21 | 1.327842 | 110.140562 | -54.512835  |
| 31 | F      | 29 | 26 | 21 | 1.329860 | 108.873140 | -174.842786 |
| 32 | F      | 29 | 26 | 21 | 1.336796 | 109.516442 | 65.781864   |

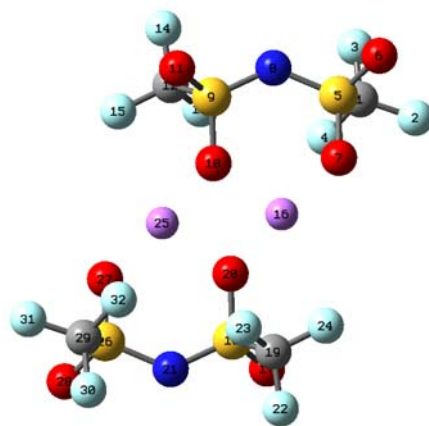

Supplement: Supplementary file 1 [file 4357162]
